# Supplementary material for: Emergence of a Globally Dominant IncHI1 Plasmid Type Associated with Multiple Drug Resistant Typhoid
Source: PLoS Negl Trop Dis. 2011 Jul 19;5(7):e1245. doi: 10.1371/journal.pntd.0001245 (PMC3139670; doi:10.1371/journal.pntd.0001245)
Supplement: Table S3 — Biolog phenotype array results. (XLS) [file pntd.0001245.s003.xls]

## Sheet: Sheet1
		Legend
		+: Faster growth compared to BRD948
		-: Slower growth compared to BRD948
		0: No difference from BRD948
Condition	Mode of Action	BRD948-pHCM1	BRD948-pSTY7	(MIC)
Sanguinarine	ATPase, Na+/K+ and Mg++	0	+
5,7-Dichloro-8-hydroxy-quinaldine	chelator, lipophilic	+	0
8-Hydroxyquinoline	chelator, lipophilic	-	0
2-Phenylphenol	DNA intercalator	-	0
Acriflavine	DNA intercalator	+	0
Oxolinic acid	DNA unwinding, gyrase (GN), topoisomerase (GP), quinolone	+	0
Trimethoprim	folate synthesis, dihyldrofolate reductase inhibitor	+	+
Benserazide	fungicide	+	0
Chloroxylenol	fungicide	0	+
Captan	fungicide, carbamate, multisite	+	-
Dichlofluanid	fungicide, phenylsulphamide	+	+
Tolylfluanid	fungicide, phenylsulphamide	+	0
D-Serine	inhibits 3PGA dehydrogenase (L-serine and pantothenate synthesis)	+	+
o-Cresol	membrane	-	-
Phenylethanol	membrane	+	+
Colistin	membrane, cyclic peptide	+	+
5% Potassium Chloride	osmotic sensitivity, KCl	+	+
6% Potassium Chloride	osmotic sensitivity, KCl	0	+
3% NaCl	osmotic sensitivity, NaCl	0	+
4% NaCl	osmotic sensitivity, NaCl	0	+
5% NaCl	osmotic sensitivity, NaCl	0	+
2% Sodium Lactate	osmotic sensitivity, sodium lactate	+	+
1-Chloro-2,4-dinitrobenzene	oxidation, glutathione	0	-
Potassium superoxide	oxidizing agent	+	+
pH 9.5 + L-Serine	pH, deaminase	0	-
pH 9.5 + L-Threonine	pH, deaminase	0	-
pH 4.5 + L-Lysine	pH, decarboxylase	-	-
pH 10	pH, growth at 10	0	-
Chloramphenicol	protein synthesis	+	+
Streptomycin	protein synthesis, 30S ribosomal subunit, aminoglycoside	+	+
Rolitetracycline	protein synthesis, 30S ribosomal subunit, tetracycline	+	+
Gentamicin	protein synthesis, aminoglycoside	+	+
Streptomycin	protein synthesis, aminoglycoside	+	+
Troleandomycin	protein synthesis, macrolide	-	0
Chlortetracycline	protein synthesis, tetracycline	+	+
Demeclocyline	protein synthesis, tetracycline	+	+
Doxycycline	protein synthesis, tetracycline	+	+
Minocycline	protein synthesis, tetracycline	+	+
Oxytetracycline	protein synthesis, tetracycline	+	+
Penimepicycline	protein synthesis, tetracycline	+	+
Tetracycline	protein synthesis, tetracycline	+	+
Iodonitro tetrazolium violet	respiration	-	-
Guanazole	ribonucleotide DP reductase	-	-
Rifampicin	RNA polymerase	-	-
Rifamycin SV	RNA polymerase	+	+
Sodium cyanate	toxic anion	+	0
Lithium chloride	toxic cation	-	-
Zinc chloride	toxic cation	+	0
Phenylarsine oxide	tyrosine phosphatase inhibitor	-	-
Cefazolin	wall, cephalosporin	+	+
Cefotaxime	wall, cephalosporin	+	+	*MIC ≤0.125 mg/mL for both isolates; same for cefepime, ceftazidime
Ceftriaxone	wall, cephalosporin	+	+
Cephalothin	wall, cephalosporin	+	+
Cefmetazole	wall, cephalosporin second generation	0	+
Cefoxitin	wall, cephalosporin second generation	0	-
Cefoperazone	wall, cephalosporin third generation	+	+
Amoxicillin	wall, lactam	+	+
Azlocillin	wall, lactam	+	+
Aztreonam	wall, lactam	-	-
Nafcillin	wall, lactam	+	0
Oxacillin	wall, lactam	+	+
Penicillin G	wall, lactam	+	+
Phenethicillin	wall, lactam	+	+
1-Hydroxy- pyridine-2-thione		+	0
